# Supplementary material
Source: ML conference proceedings conference paper supplement (https://openreview.net/forum?id=65wkjAvIw5)
Supplement: supplementary_material [file attachment]

# Effectiveness of Kinesthetic Sensing in In-Hand Rotation of Objects with an Eccentric Center of Mass

Chanyoung Ahn<sup>1</sup>, Sungwoo Park<sup>1,2</sup>, Donghyun Hwang<sup>1†</sup>

<sup>1</sup>Korea Institute of Science and Technology, <sup>2</sup>Korea University  
{chanyoung.ahn; sungwoo.park; donghyun}@kist.re.kr

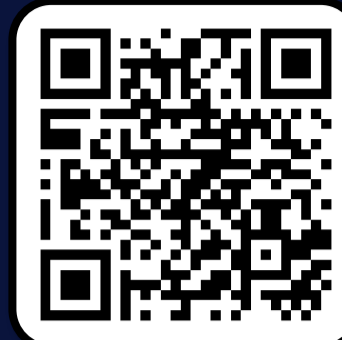

Watch the project video!

Project Website:

[https://cold-young.github.io/kinesthetic\\_rotation/](https://cold-young.github.io/kinesthetic_rotation/)

## INTRODUCTION

### Research Aim

- ✓ Investigation of how **kinesthetic feedback** (joint forces and torques) enables **adaptation to object** properties such as weight and center of mass (CoM)
- ✓ Evaluation of the effectiveness of reinforcement learning in leveraging kinesthetic feedback for robust **downward-facing in-hand rotation**

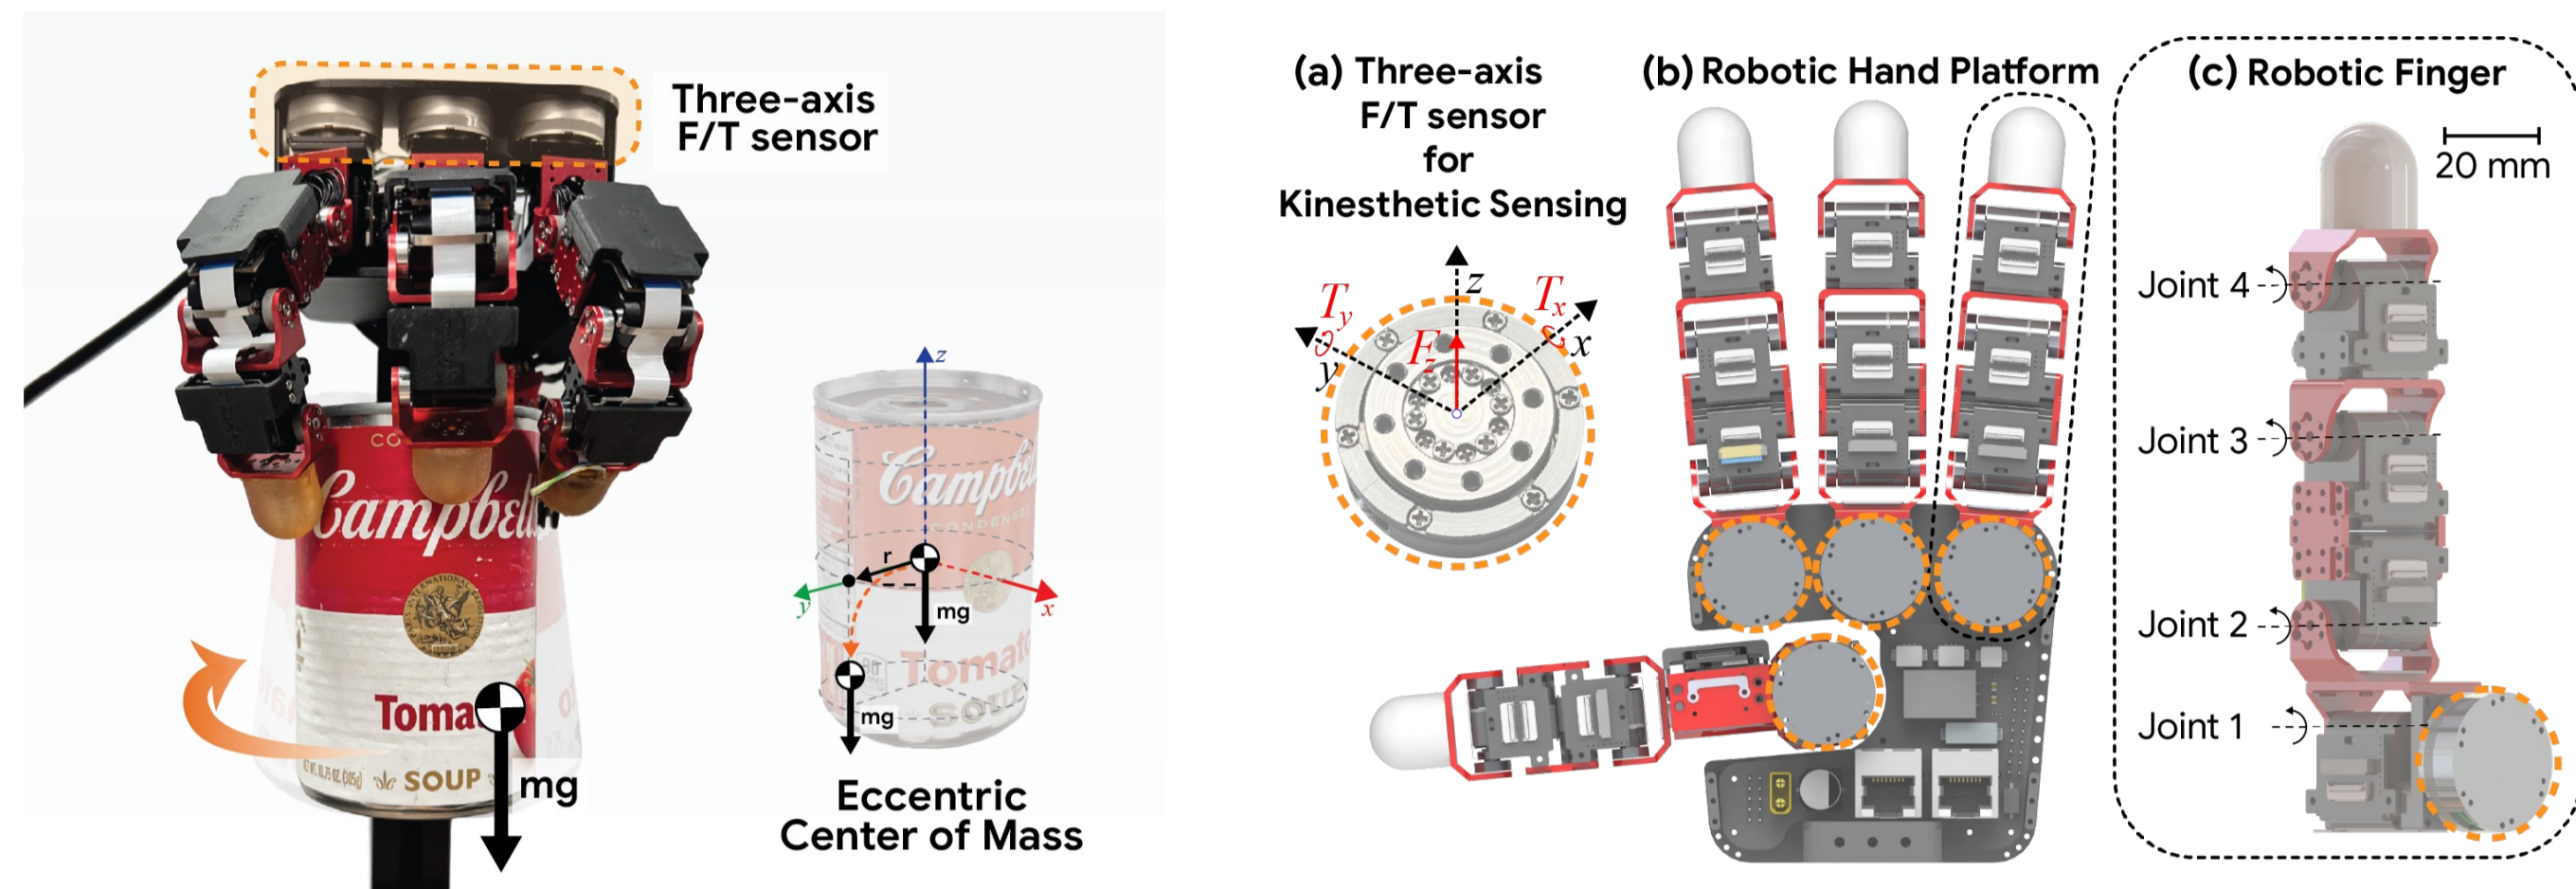

## PROBLEM FORMULATION

### Task Objective

- ✓ Exploration of stable in-hand rotation strategies for cylindrical objects with an eccentric CoM
- ✓ **Target: Object rotation toward a downward-facing goal** within a 5-second rollout, maximizing alignment-based rewards

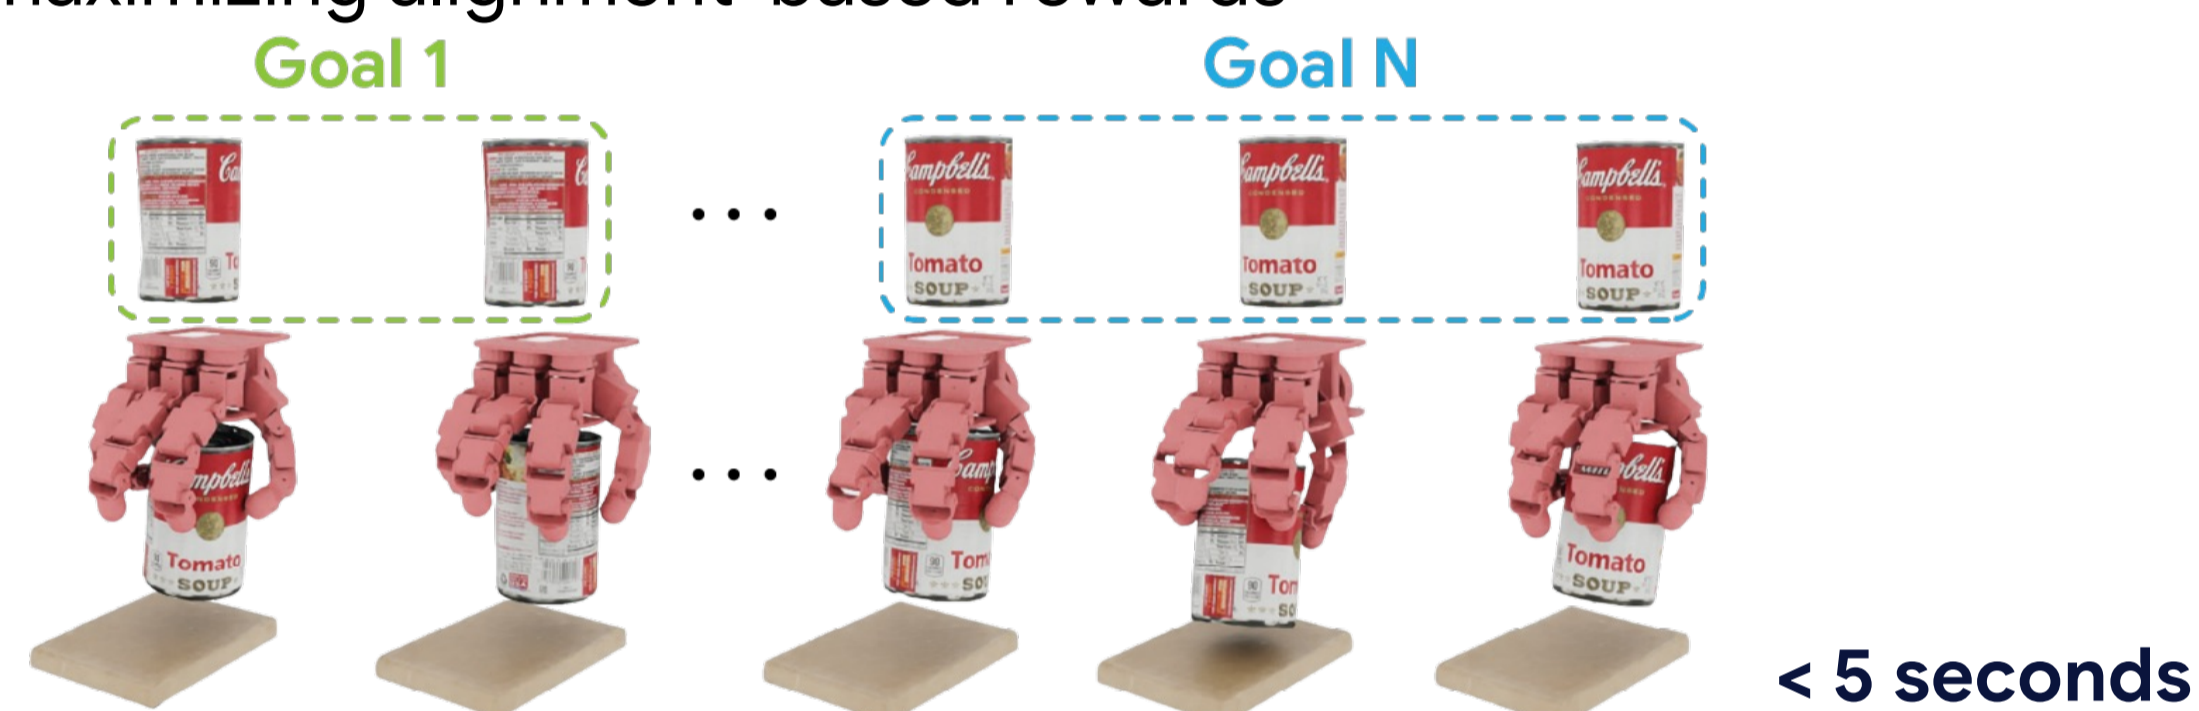

### Formulation as MDP

- ✓ Task formulated as an MDP with state, action and reward definitions

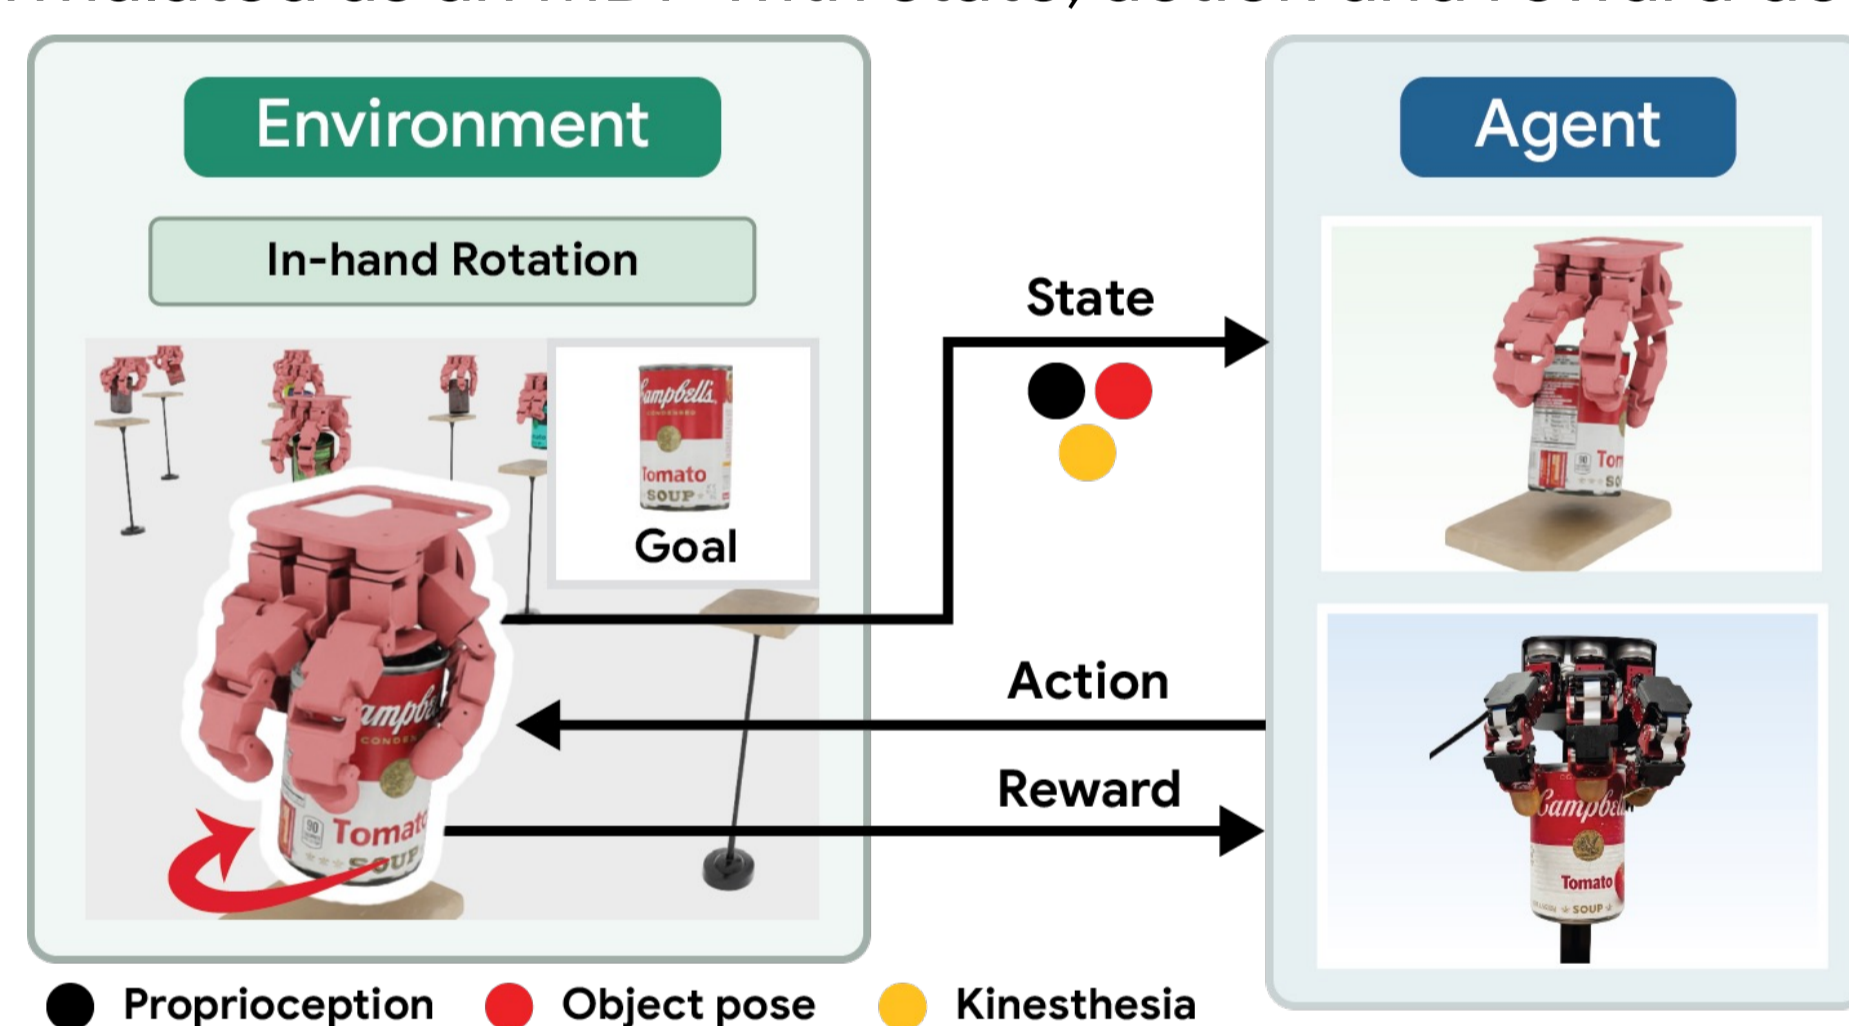

- **Action:** 16-DoF joint position commands

$$\tilde{a}_t = \eta a_t + (1 - \eta) \tilde{a}_{t-1} \quad t \geq 1, \tilde{a}_t = 0, \eta = 0.035$$

- **Reward:** alignment with goal, penalty for fall/contact, velocity constraint, success bonus (see Table 1)

Table 1. Reward Components

|                   |                                                        |
|-------------------|--------------------------------------------------------|
| $r_{\text{rot}}$  | Alignment with target orientation                      |
| $r_{\text{fall}}$ | Penalty when the object falls off the table            |
| $r_{\text{cont}}$ | Penalty for contact between object and table           |
| $r_{\text{vel}}$  | Penalty for excessive rotational speed                 |
| $r_{\text{dist}}$ | Reward based on proximity to the target pose           |
| $r_{\text{goal}}$ | Sparse reward for achieving the final goal orientation |

- **State:** joint angles, object pose, goal orientation, delta rotation, fingertip pose, previous target, and kinesthetic feedback (F/T)

## EVALUATION SETUP

### Simulation Setup

- ✓ Used 25 cylindrical objects with varying mass and CoM
- ✓ Three policy variants differ only in observation modalities (see Table 2):

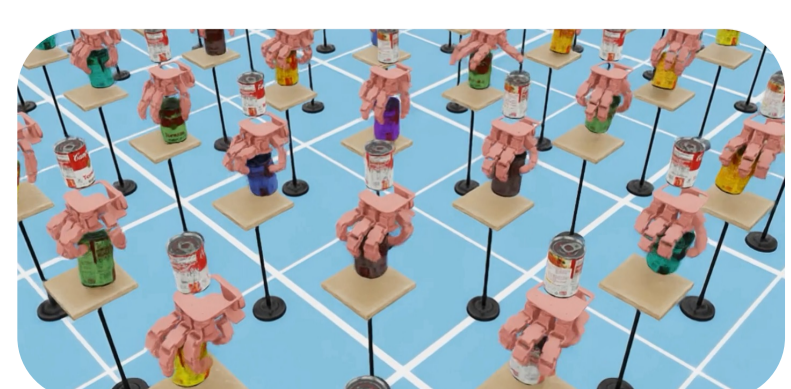

Simulation: Isaac Sim with 4096 parallel environments  
Training: PPO, 40K steps, Five random seeds  
Evaluation: 500 rollouts per instance  
Hardware: Single RTX 4090 GPU

## PERFORMANCE EVALUATION

### Impact on Sensory Modalities on Performance

- ✓ **Three state configurations:** without kinesthetic feedback, with kinesthetic feedback, and with PCA-compressed kinesthetic feedback

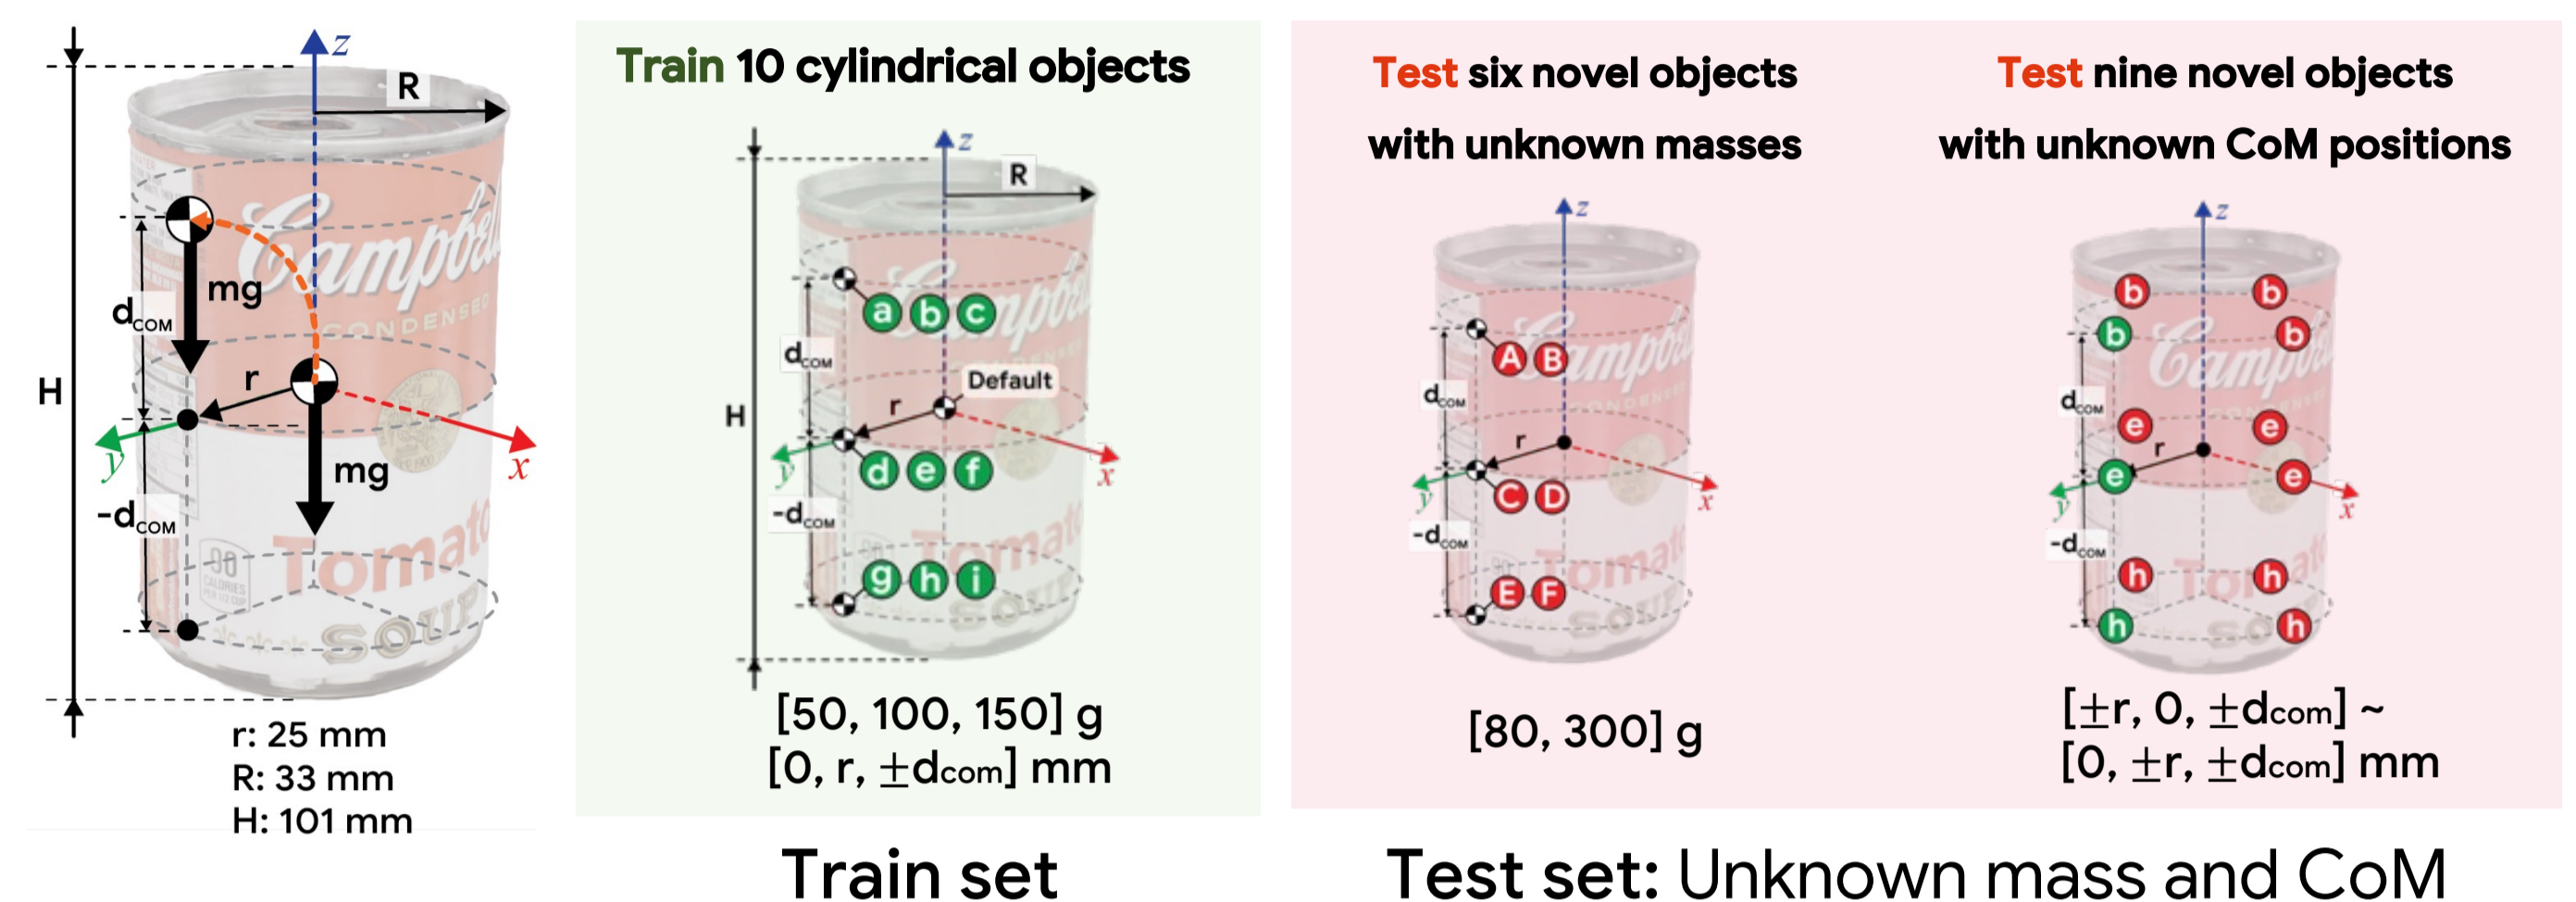

### Results

- ✓ Demonstrate that **kinesthetic feedback significantly improved performance** in in-hand rotation task

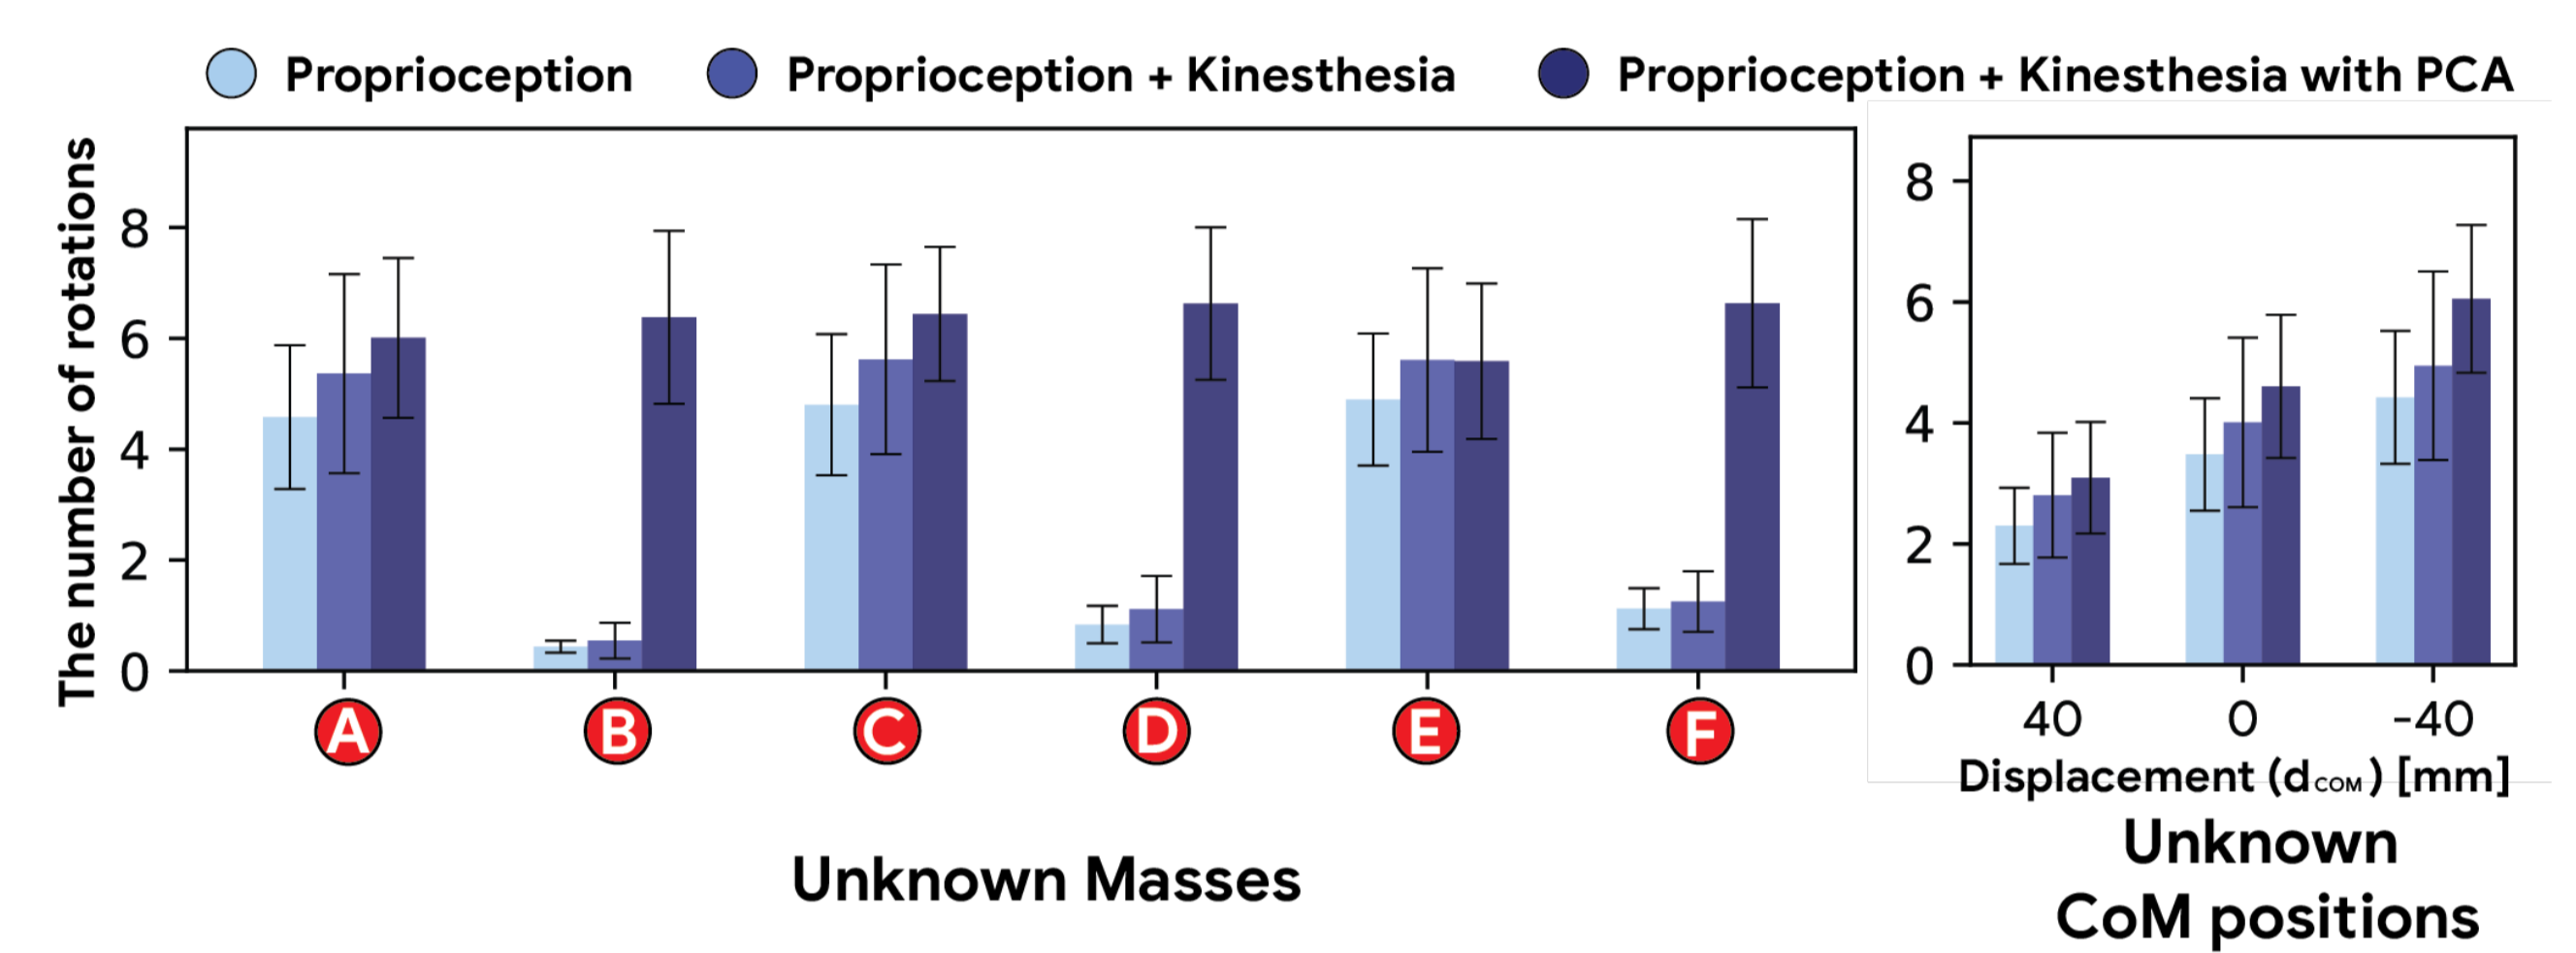

#### 1. Performance on Unknown CoM position

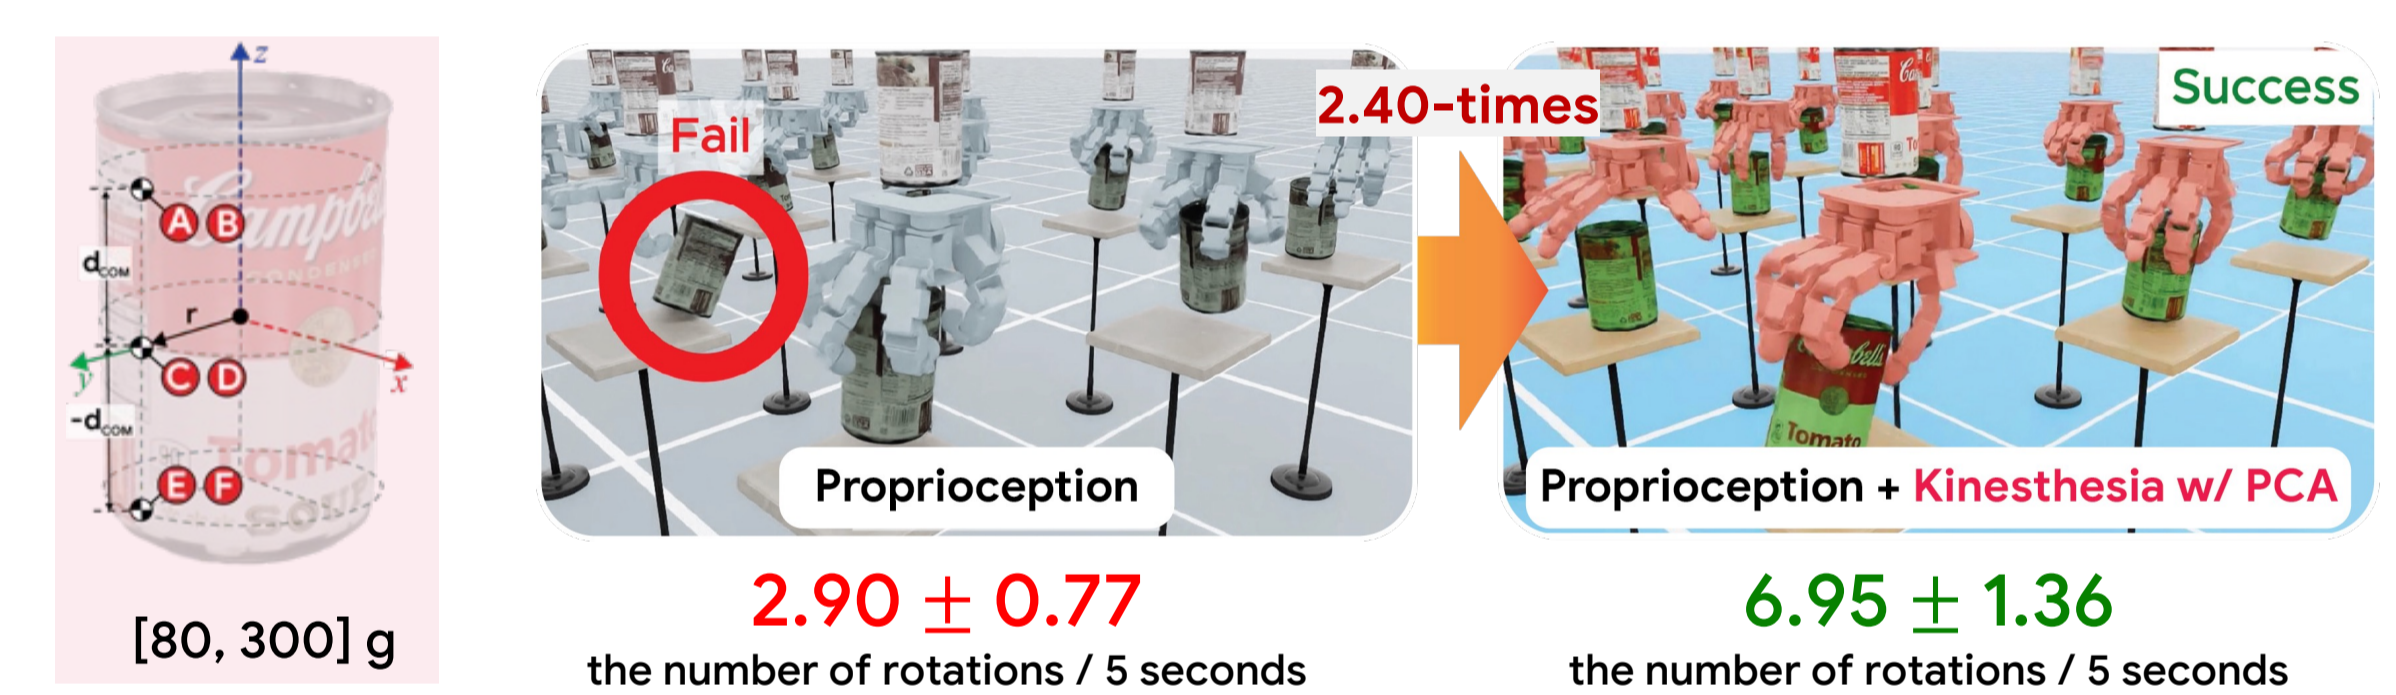

#### 2. Performance on Unknown Mass

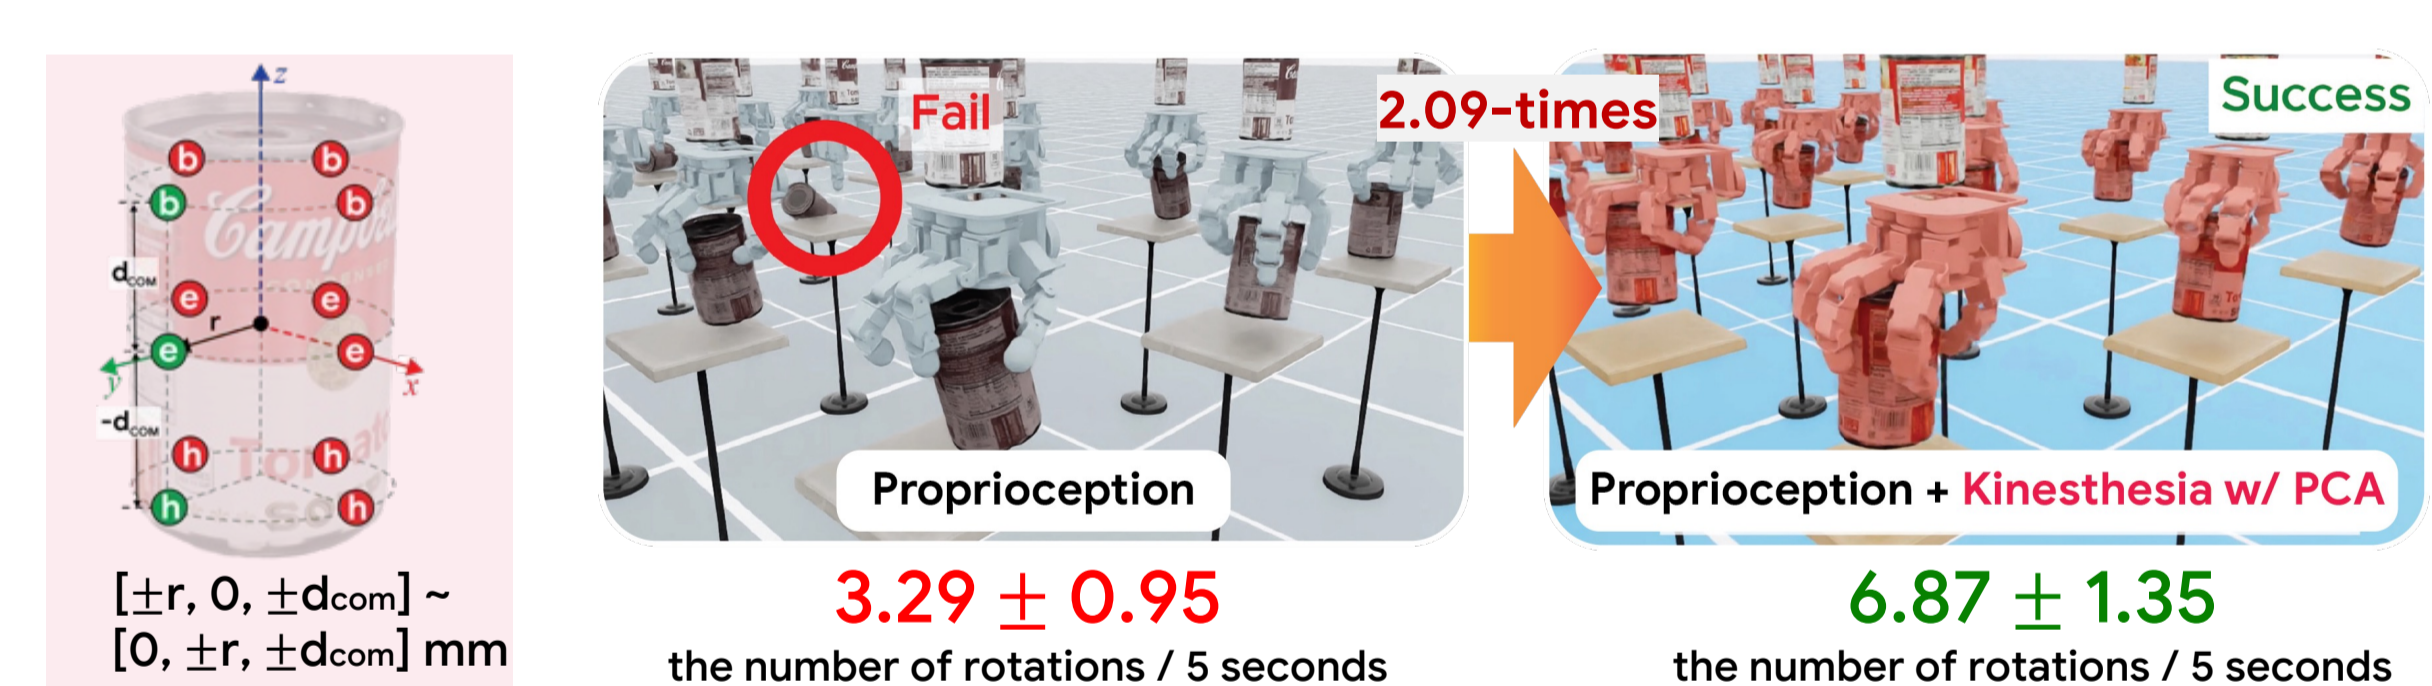

Table 3. Results of the In-Hand Rotation

|                                              | Max Reward (mean)                | Pre-trained Samples          | Unknown Mass                 | Unknown CoM Positions        |
|----------------------------------------------|----------------------------------|------------------------------|------------------------------|------------------------------|
| <b>Proprioception</b>                        | 419.05<br>± 92.41                | 4.47<br>± 1.14               | 3.29<br>± 0.95               | 2.90<br>± 0.77               |
| <b>Proprioception + Kinesthesia</b>          | 477.30<br>± 143.31               | 5.01<br>± 1.75               | 3.73<br>± 1.26               | 3.35<br>± 1.19               |
| <b>Proprioception + Kinesthesia with PCA</b> | <b>569.71</b><br><b>± 104.59</b> | <b>6.78</b><br><b>± 1.24</b> | <b>6.87</b><br><b>± 1.35</b> | <b>6.95</b><br><b>± 1.36</b> |

1.52x

2.09x

2.40x

## CONCLUSION & FUTURE WORK

### Conclusion

- ✓ Improved adaptability through kinesthetic feedback in in-hand manipulation
- ✓ 1.52-, 2.09-, and 2.40-times performance from incorporating kinesthetic sensing across CoM variations

### Future Work

- ✓ Extend the current approach to real-world robotic experiments to assess robustness under sensor noise and mechanical compliance
